# Supplementary material for: General Strategies for Preparing Hybrid Polymer/Quantum Dot Nanocomposites for Color Conversion
Source: MDPI journal article supplement (doi:10.3390/nano13233072), 2023-12-03
Supplement: s1 [file s1]

*Supporting information*

## **General Strategies for Preparing Hybrid Polymer/Quantum Dot Nanocomposites for Color Conversion**

**Guan-Hong Chen <sup>1</sup>, Chen-Te Lin <sup>2</sup>, Po-Hsun Chen <sup>2</sup>, Tyng-Woei Jang <sup>2</sup> and Hsueh-Shih Chen <sup>1,2,3,\*</sup>**

<sup>1</sup> Department of Materials Science and Engineering, National Tsing Hua University, Hsinchu 30013, Taiwan; p01122334@gmail.com

<sup>2</sup> College of Engineering, National Tsing Hua University, Hsinchu 30013, Taiwan; chentelin@gapp.nthu.edu.tw (C.-T.L.); xenic0413@gmail.com (P.-H.C.); mse111031624@gapp.nthu.edu.tw (T.-W.J.)

<sup>3</sup> College of Semiconductor Research, National Tsing Hua University, Hsinchu 30013, Taiwan

\* Correspondence: chenhs@mx.nthu.edu.tw

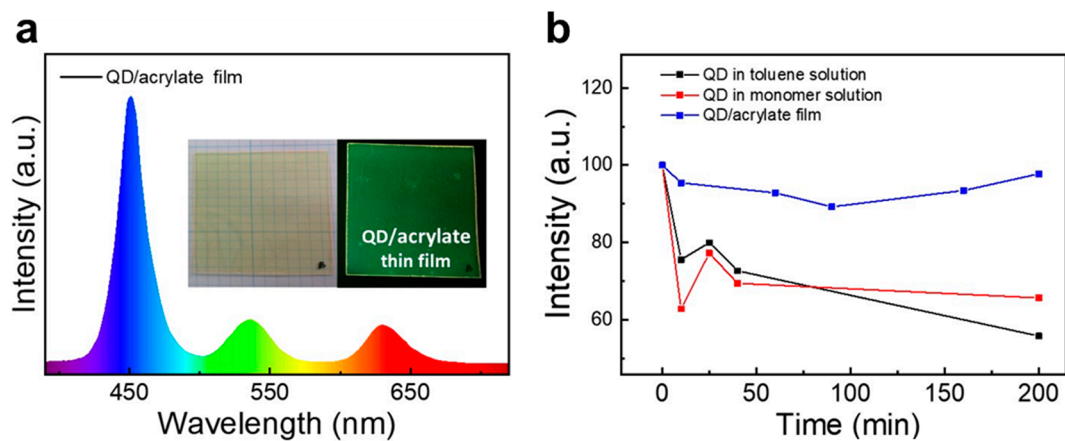

**Figure S1.** (a) PL spectrum of QD/acrylate optical film measured and integrated in a 15" blue LCD backlit. Inset photos of QD/acrylate optical film under indoor light (left) and UV lamp (right). (b) Thermal stability of QD solution and QD/acrylate film.

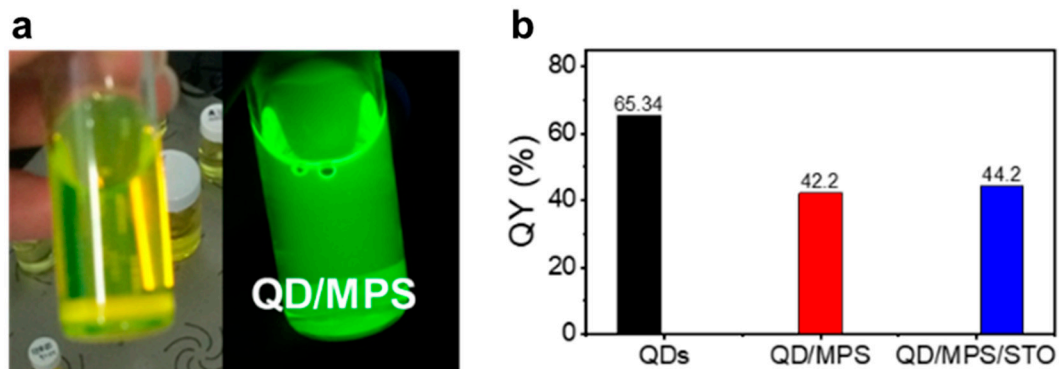

**Figure S2.** (a) Photos of MPS-modified QDs highly-dispersed in ethanol solution. (b) QYs of as-synthesized QDs, QD/MPS and QD/MPS/STO.

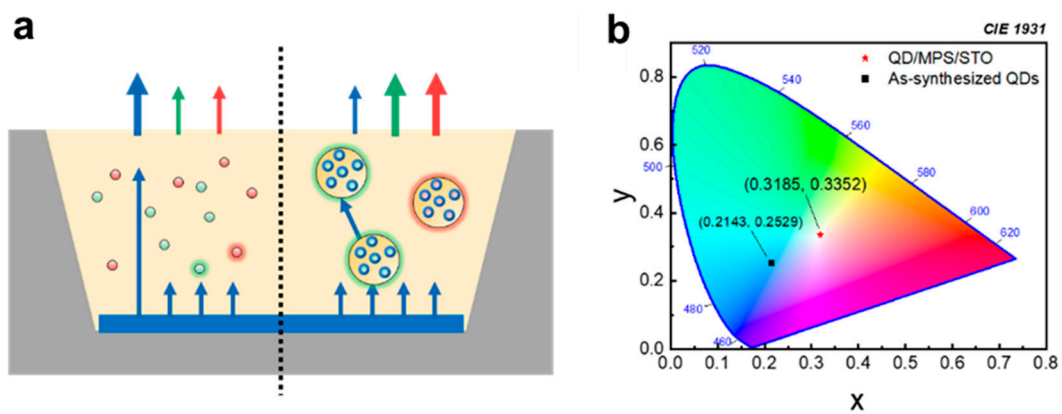

**Figure S3.** (a) Schematic diagram of QD optical diffusers for white LED compared with directly dispensing QDs in resin and showing longer light path length. (b) White points in CIE 1931 color space of QDCC-based on-chip LEDs along with the as-synthesis QDs (black point) and the QD optical diffusers (red point).

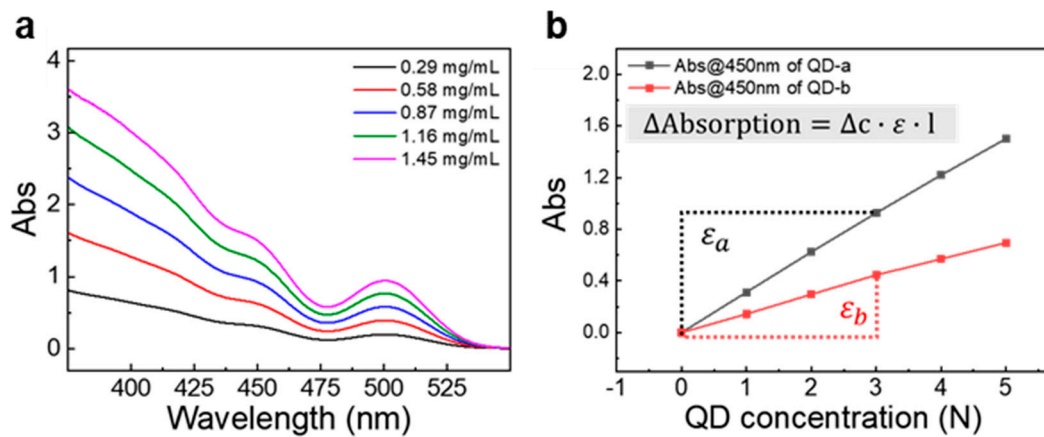

**Figure S4.** (a) Linear absorption evolution upon the increasing QD concentration of QD toluene solution. (b) Estimation of absorption coefficient for optical density of QDs.

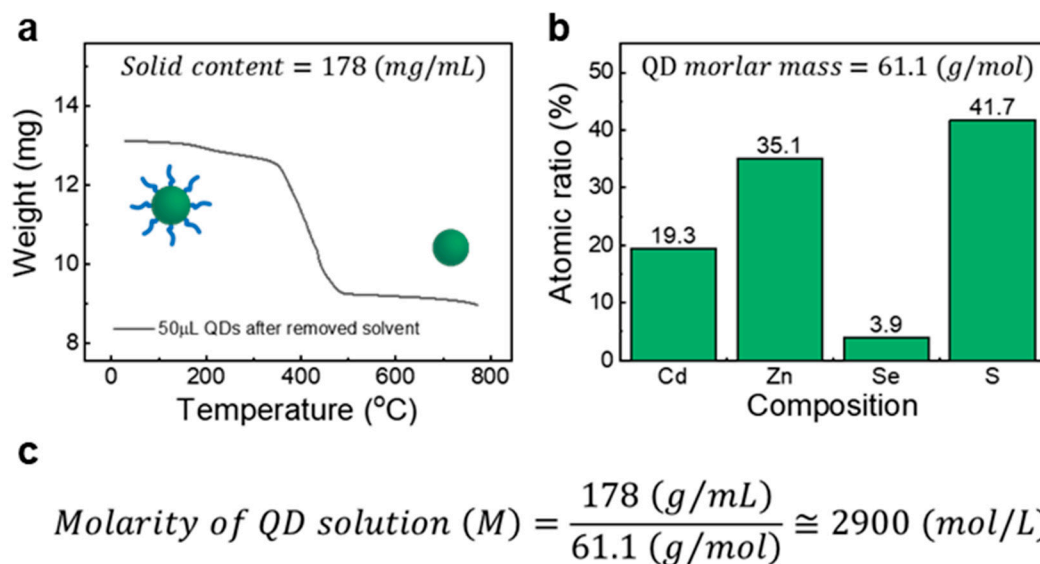

**Figure S5.** Gravimetric quantification of QD solution using TGA and ICP-MS. (a) TGA measurement of the solid content of 50 μL QDs. The solvent is removed before TGA analysis. (b) Atomic ratio of QDs estimated from the ICP-MS. The QD molar mass is calculated according to the atomic ratio. (c) Calculation of QD molarity in solution by incorporating the data from TGA and ICP-MS.

### Quantification of QD with gravimetric methods:

To quantify QD concentration by conventional gravimetric method, it requires the concentration of colloidal QD solution expressed by the solid content (denoted to QD weight) over solution volume (Figure S5a). However, the solid content of QDs comprised not only the inorganic crystalline structure but also the organic ligands shell having much boiling point (> 300 °C). The ligand content on QD is widely ranged from 20 wt. % to 50 wt. % depending on the different QDs, particle size, and elution method. This may add layers of difficulty on comparing the photonic property between the samples using different QDs, since the exact particle number is ambiguous. To measure the exact “solid content” of QD solution, an advanced gravimetric quantification is necessary. In most cases, the ligand is evaporated or decomposed by performing the thermogravimetry analysis (TGA) from room temperature to as high as 800 °C under inert atmosphere, which can separate the organic ligand or residue from the semiconductor core (Figure S5b). Hence, the amount of QDs dissolved in a specific volume of a liquid is acquired, of which the solution concentration of milligrams per milliliter (mg/mL) can be easily converted to part per million (ppm) for describing dilute solutions in chemistry (Figure S5c). In terms of scientific coherence, the unit of solid content from TGA can be further converted to the molar concentration (molarity, M), which is a unit of coherent system, by incorporating the atomic ratio estimated from an inductively coupled plasma mass spectrometry (ICP-MS).

**Table S1.** List of acrylic monomers used in this study and their solubility in water.

| Abbreviation          | Full name                                               | Functional group(s)               | Solubility in water (mg/L) |
|-----------------------|---------------------------------------------------------|-----------------------------------|----------------------------|
| LMA                   | Lauryl methacrylate                                     | Long-chain alkyl chain            | Insoluble (< 0.001)        |
| IBOA                  | Isobornyl acrylate                                      | Bicyclic isobornyl group.         | Insoluble (10)             |
| LA                    | Lauryl acrylate                                         | Long-chain alkyl chain.           | Insoluble (0.15)           |
| IOA                   | Isooctyl acrylate                                       | Long-chain alkyl chain.           | Insoluble (12)             |
| DCPMA                 | Dicyclopentanyl Methacrylate                            | Dicyclopentanyl group.            | Insoluble (N/A)            |
| IDMA                  | Isodecyl methacrylate                                   | Long-chain alkyl chain.           | Insoluble (0.2)            |
| MPEG600MA             | Methoxy poly(ethylene glycol) methacrylate              | Poly(ethylene oxide) segments.    | Soluble (N/A)              |
| HPPA                  | 2-Hydroxy-3-phenoxypropyl acrylate                      | Hydroxyl and phenoxy groups.      | Soluble (3300)             |
| NP(PO) <sub>2</sub> A | Nonylphenol poly(propylene glycol) acrylate             | Poly(propylene oxide) segments.   | Soluble (N/A)              |
| ACMO                  | 4-Acryloylmorpholine                                    | Acrylamide and morpholine groups. | Soluble (N/A)              |
| GDMA                  | Glycerol dimethacrylate                                 | Dimethacrylates.                  | Soluble (10250)            |
| NP(EO) <sub>4</sub> A | Nonylphenol poly(ethylene glycol) <sub>4</sub> acrylate | Poly(ethylene oxide) segments.    | Soluble (N/A)              |
| NP(EO) <sub>8</sub> A | Nonylphenol poly(ethylene glycol) <sub>8</sub> acrylate | Poly(ethylene oxide) segments.    | Soluble (N/A)              |
| DEAA                  | N,N-diethylacrylamide                                   | Acrylamide group.                 | Soluble (1000)             |
| PHEA                  | 2-Phenoxyethyl acrylate                                 | Phenoxyethyl group.               | Soluble (525)              |
| BZA                   | Benzyl acrylate                                         | Benzyl group.                     | Soluble (556)              |
| THFA                  | Tetrahydrofurfuryl acrylate                             | Oxolane group.                    | Soluble (79000)            |

| Abbreviation | Full name                                     | Functional group(s)               | Solubility in water (mg/L) |
|--------------|-----------------------------------------------|-----------------------------------|----------------------------|
| EOEOEA       | 2(2-Ethoxyethoxy)<br>ethylacrylate            | Di(ethylene oxide)<br>segments.   | Soluble (13430)            |
| MPEG500MA    | Methoxy poly(ethylene glycol)<br>methacrylate | Poly(ethylene oxide)<br>segments. | Soluble (N/A)              |
| CTFA         | Cyclic trimethylolpropane<br>formal acrylate  | Dioxane group.                    | Soluble (9300)             |

*Note:* The water solubility data of the monomers were required from product Information provide by chemical supplier.



**Table S2.** Changes in PL properties of green and red QDs dispersed in different acrylic monomers.

| Acrylic monomer<br>(short) | Solution QY<br>(%) | Green PL peak<br>( $\lambda = 530$ nm, FWHM = 30 nm) |            | Red PL peak<br>( $\lambda = 620$ nm, FWHM = 26 nm) |            |
|----------------------------|--------------------|------------------------------------------------------|------------|----------------------------------------------------|------------|
|                            |                    | Shifting                                             | Broadening | Shifting                                           | Broadening |
|                            |                    |                                                      |            |                                                    |            |
| LMA                        | 61                 | +1                                                   | 0          | -1                                                 | 0          |
| IBOA                       | 60                 | +1                                                   | 0          | 0                                                  | +1         |
| LA                         | 60                 | +1                                                   | 0          | -1                                                 | 0          |
| Toluene                    | 60                 | 0                                                    | 0          | 0                                                  | 0          |
| IOA                        | 59                 | 0                                                    | 0          | -2                                                 | +1         |
| DCPMA                      | 59                 | -1                                                   | 0          | +1                                                 | 0          |
| IDMA                       | 59                 | 0                                                    | 0          | +1                                                 | 0          |
| MPEG600MA                  | 57                 | +2                                                   | 0          | +1                                                 | +1         |
| HPPA                       | 56                 | +3                                                   | 0          | +1                                                 | 0          |
| NP(PO) <sub>2</sub> A      | 56                 | +4                                                   | -1         | +1                                                 | +1         |
| ACMO                       | 56                 | -1                                                   | 0          | +1                                                 | +1         |
| GDMA                       | 54                 | +4                                                   | 0          | +2                                                 | +1         |
| NP(EO) <sub>4</sub> A      | 54                 | +3                                                   | -1         | 0                                                  | +1         |
| NP(EO) <sub>8</sub> A      | 53                 | +3                                                   | 0          | +1                                                 | +4         |
| DEAA                       | 51                 | +2                                                   | 0          | +1                                                 | 0          |
| PHEA                       | 50                 | +2                                                   | -1         | +1                                                 | +2         |
| BZA                        | 49                 | +5                                                   | -1         | +1                                                 | +1         |
| THFA                       | 43                 | +1                                                   | -1         | +1                                                 | 0          |
| EOEOEA                     | 35                 | +5                                                   | -2         | 0                                                  | +1         |
| MPEG500MA                  | 23                 | +5                                                   | -2         | -1                                                 | -1         |
| CTFA                       | 12                 | 0                                                    | -1         | +3                                                 | +3         |

*Note:* The wavelength and FWHM of the as-synthesized green and red QDs are measured when dispersed in toluene (gray marked row).
